# Supplementary material
Source: PubMed Central journal article supplement (PMC8898263)

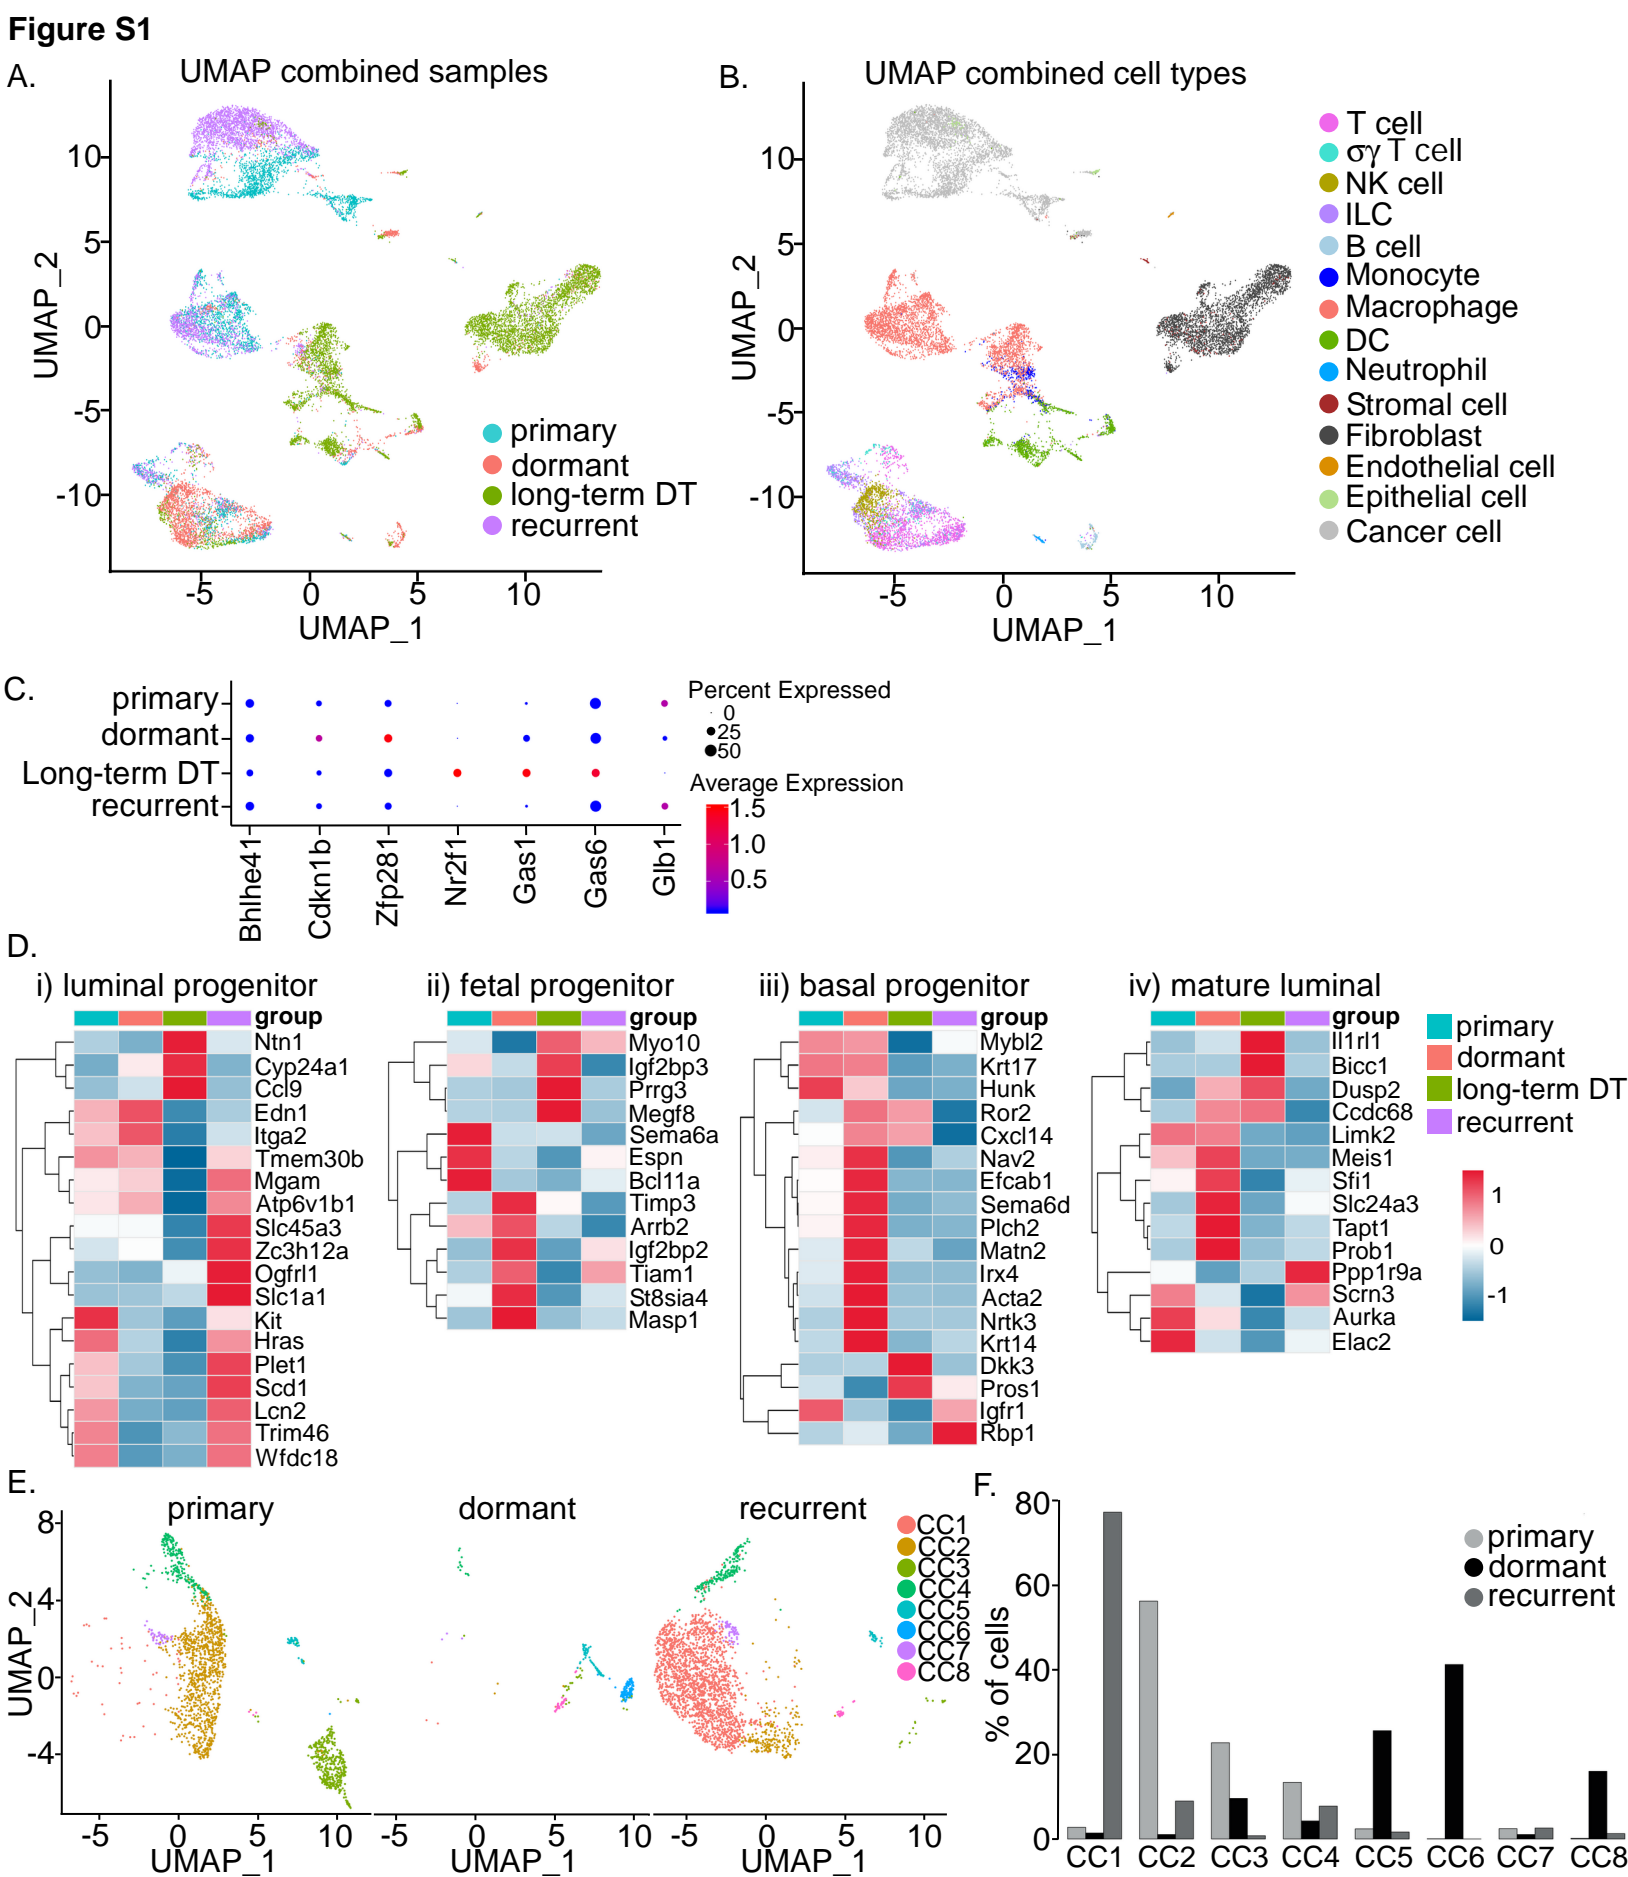

Supplement: NIHMS1768905-supplement-3.pdf [file NIHMS1768905-supplement-3.pdf]

**Figure S2**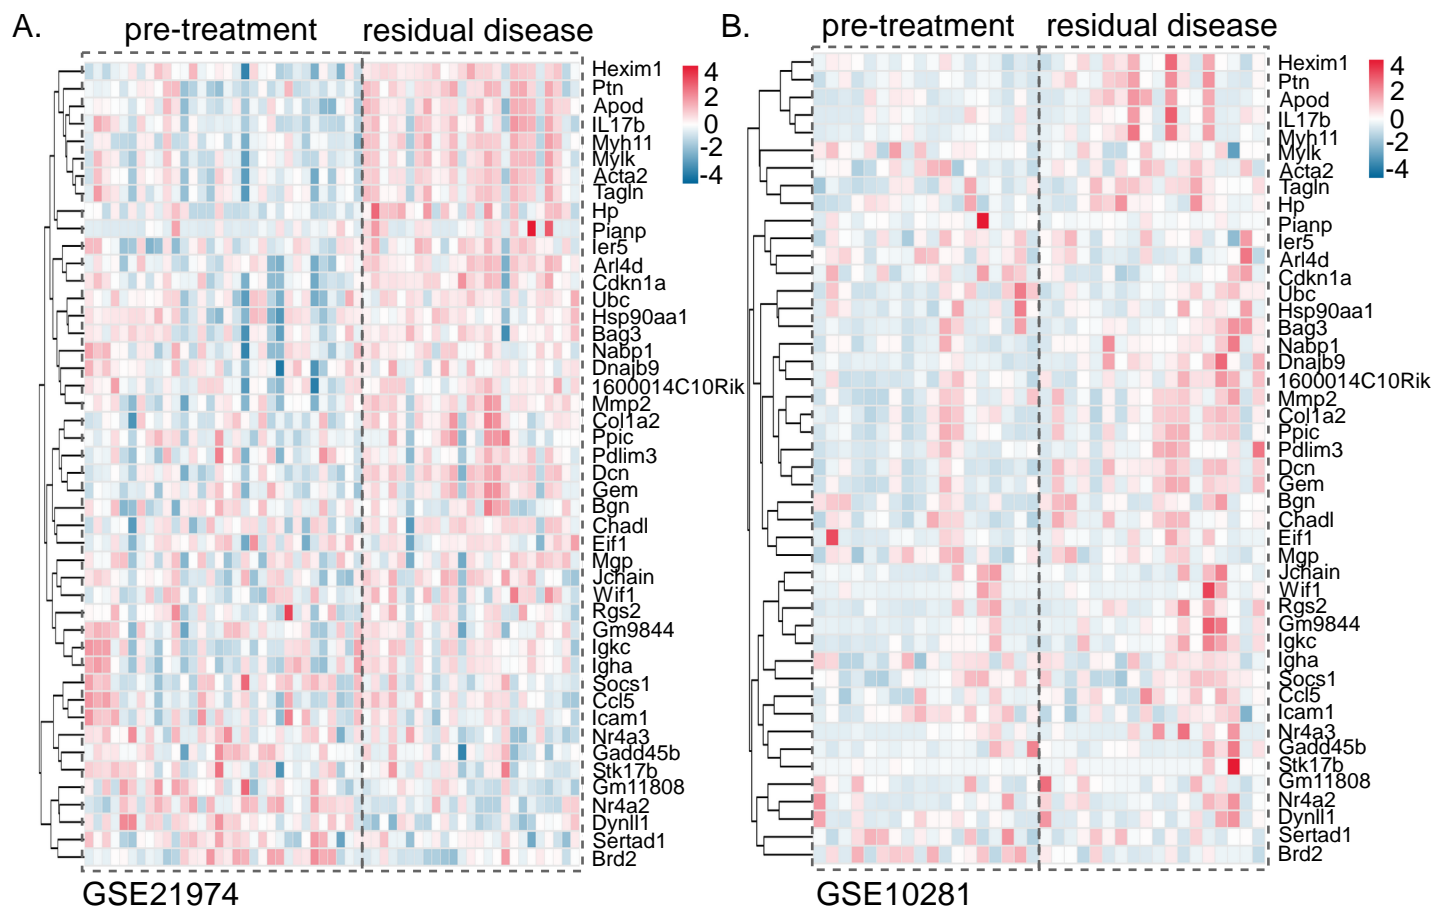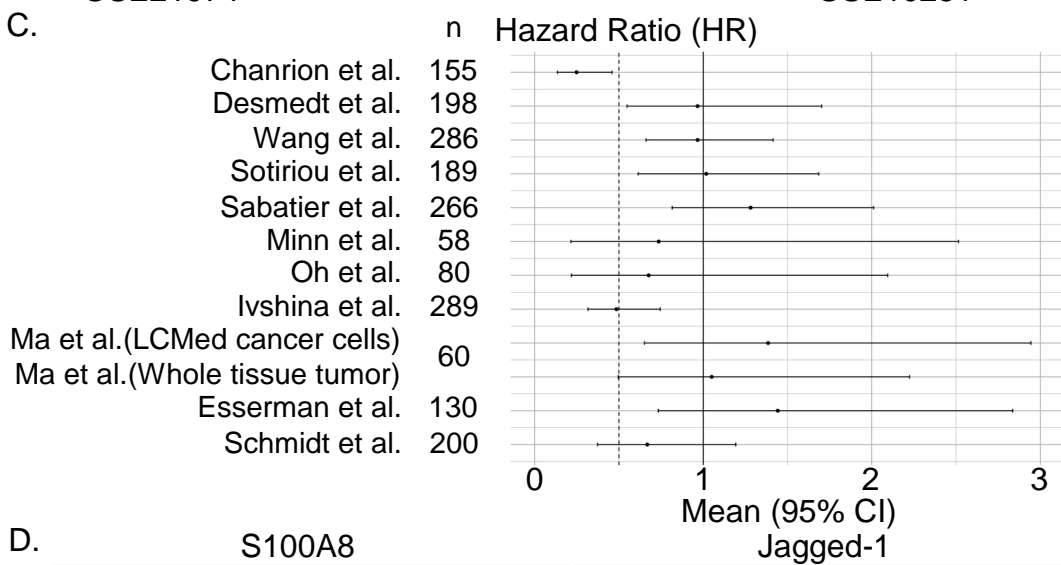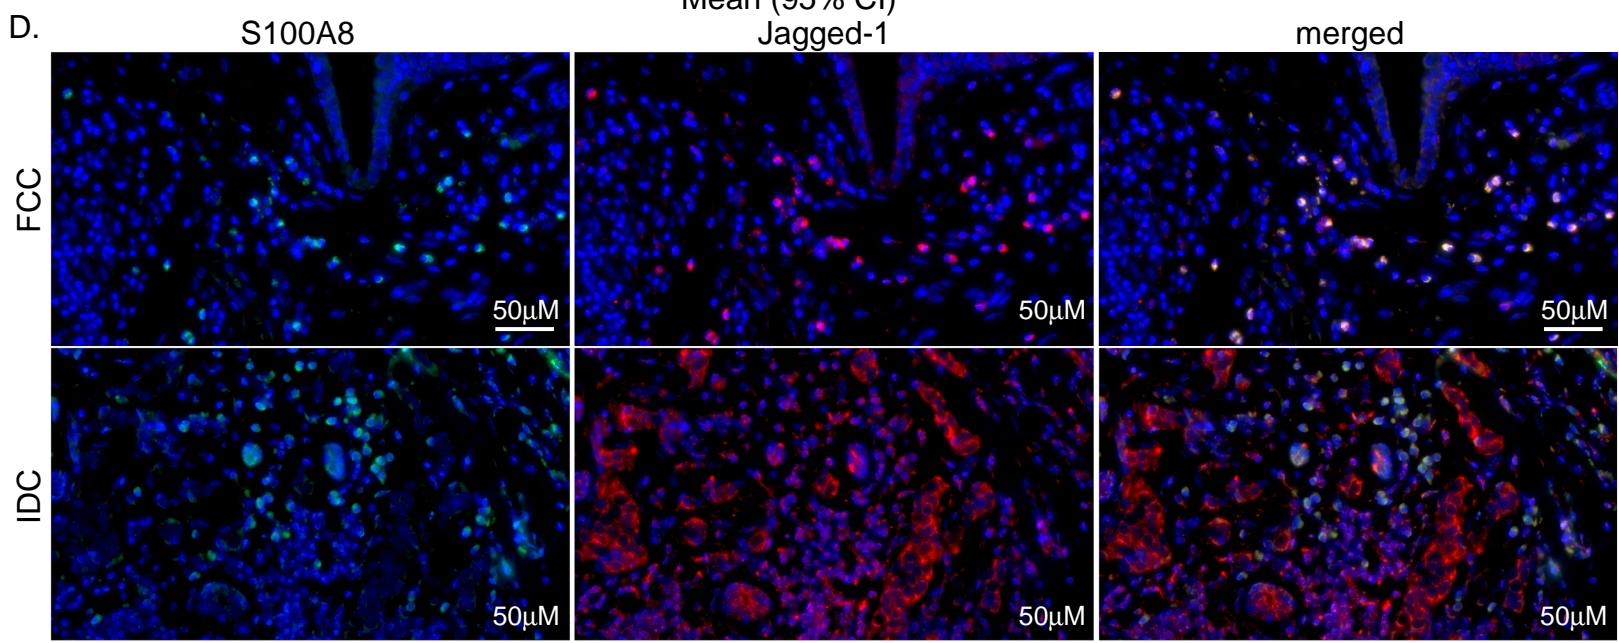

Supplement: NIHMS1768905-supplement-4.pdf [file NIHMS1768905-supplement-4.pdf]

**Figure S3**

**A.**

**myeloid panel**

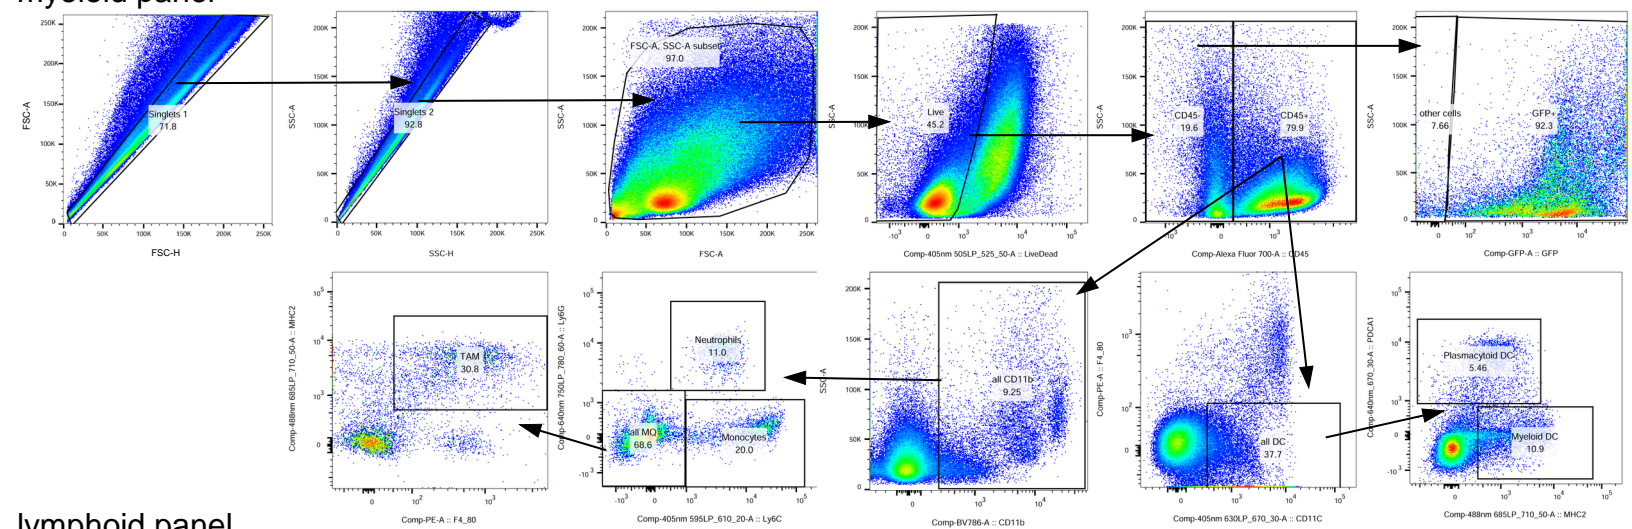

**lymphoid panel**

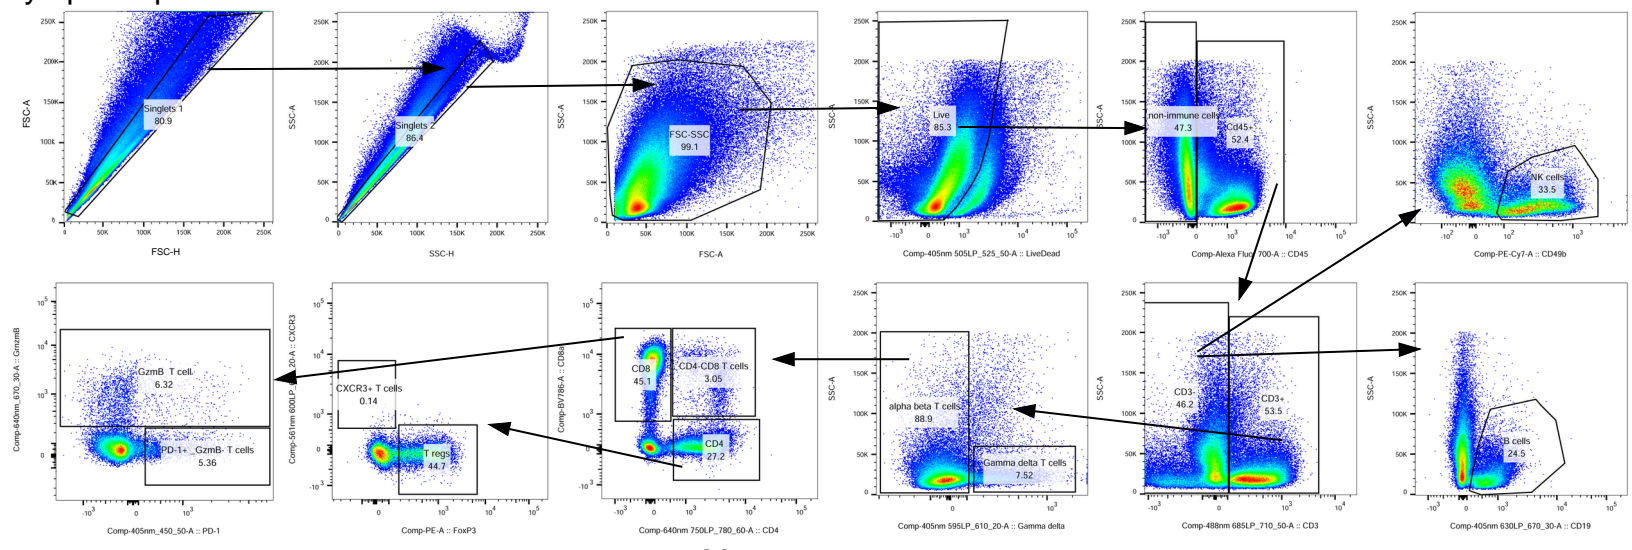

**B.**

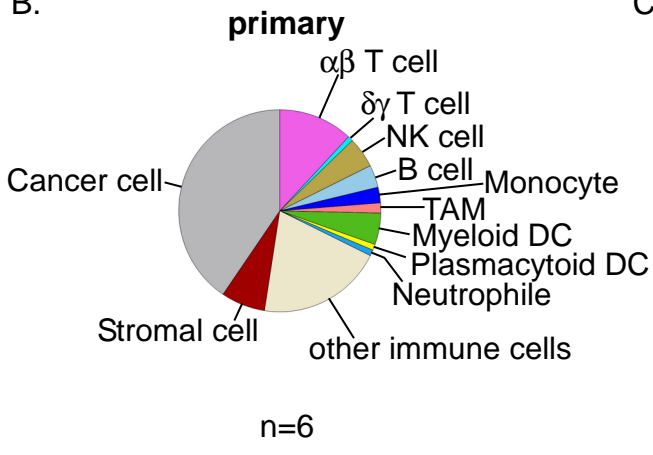

**C.**

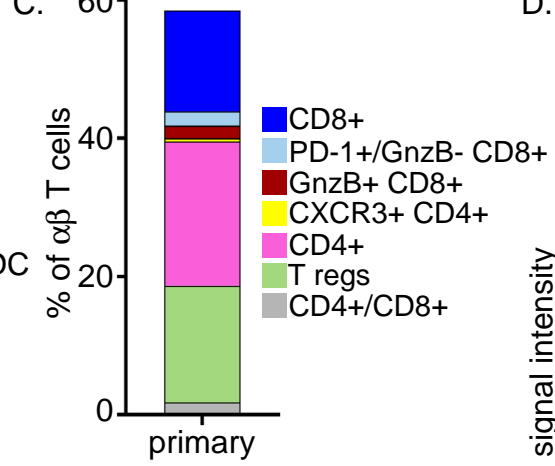

**D.**

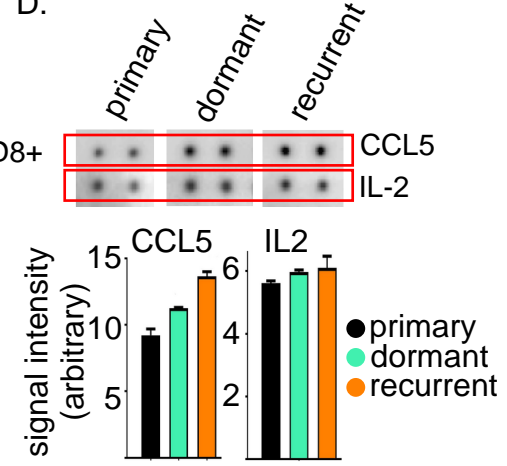

Supplement: NIHMS1768905-supplement-5.pdf [file NIHMS1768905-supplement-5.pdf]

**Figure S4**

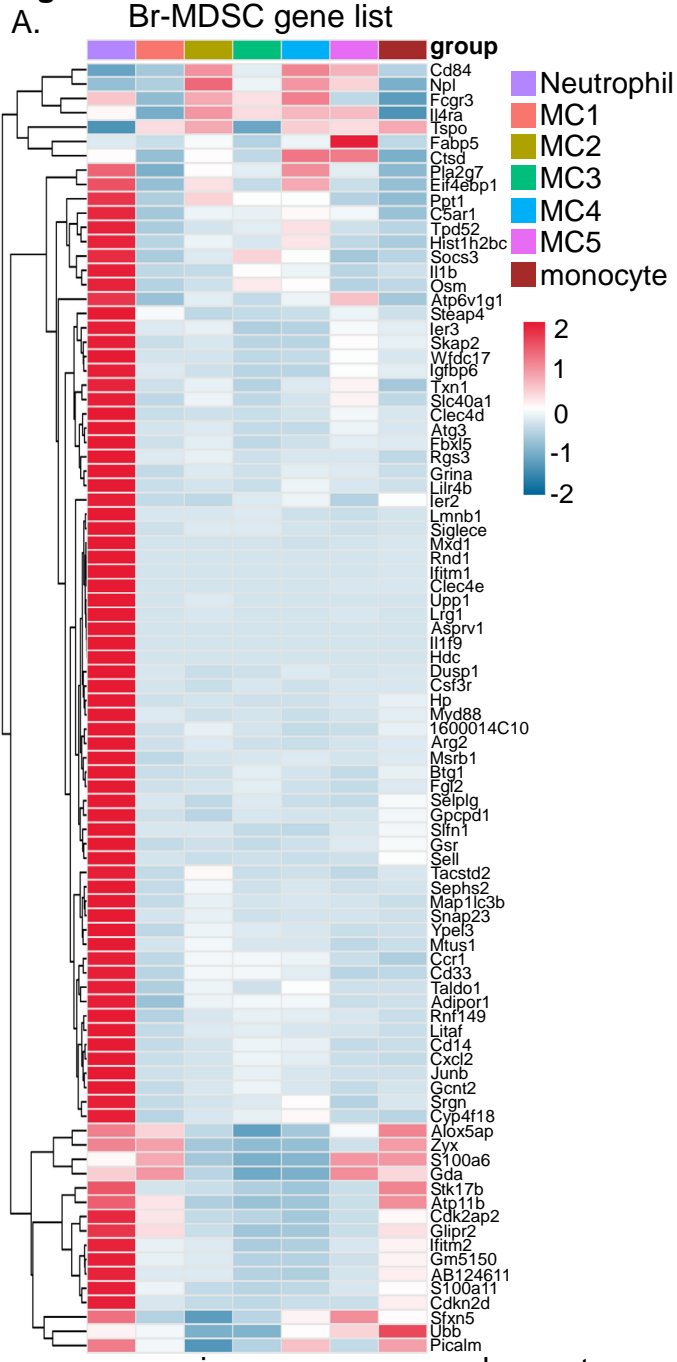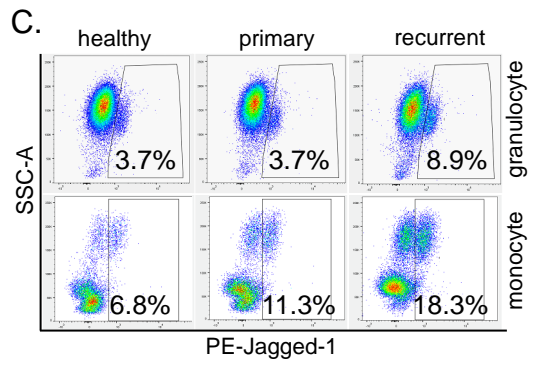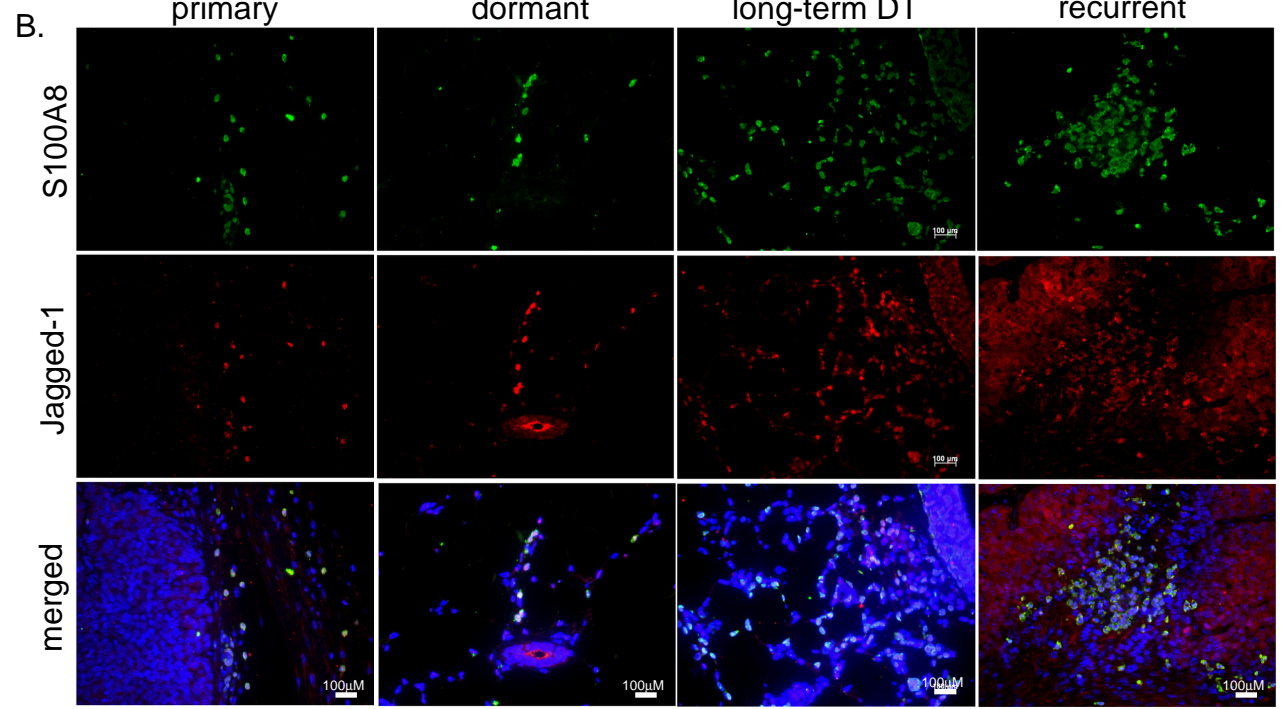

Supplement: NIHMS1768905-supplement-6.pdf [file NIHMS1768905-supplement-6.pdf]

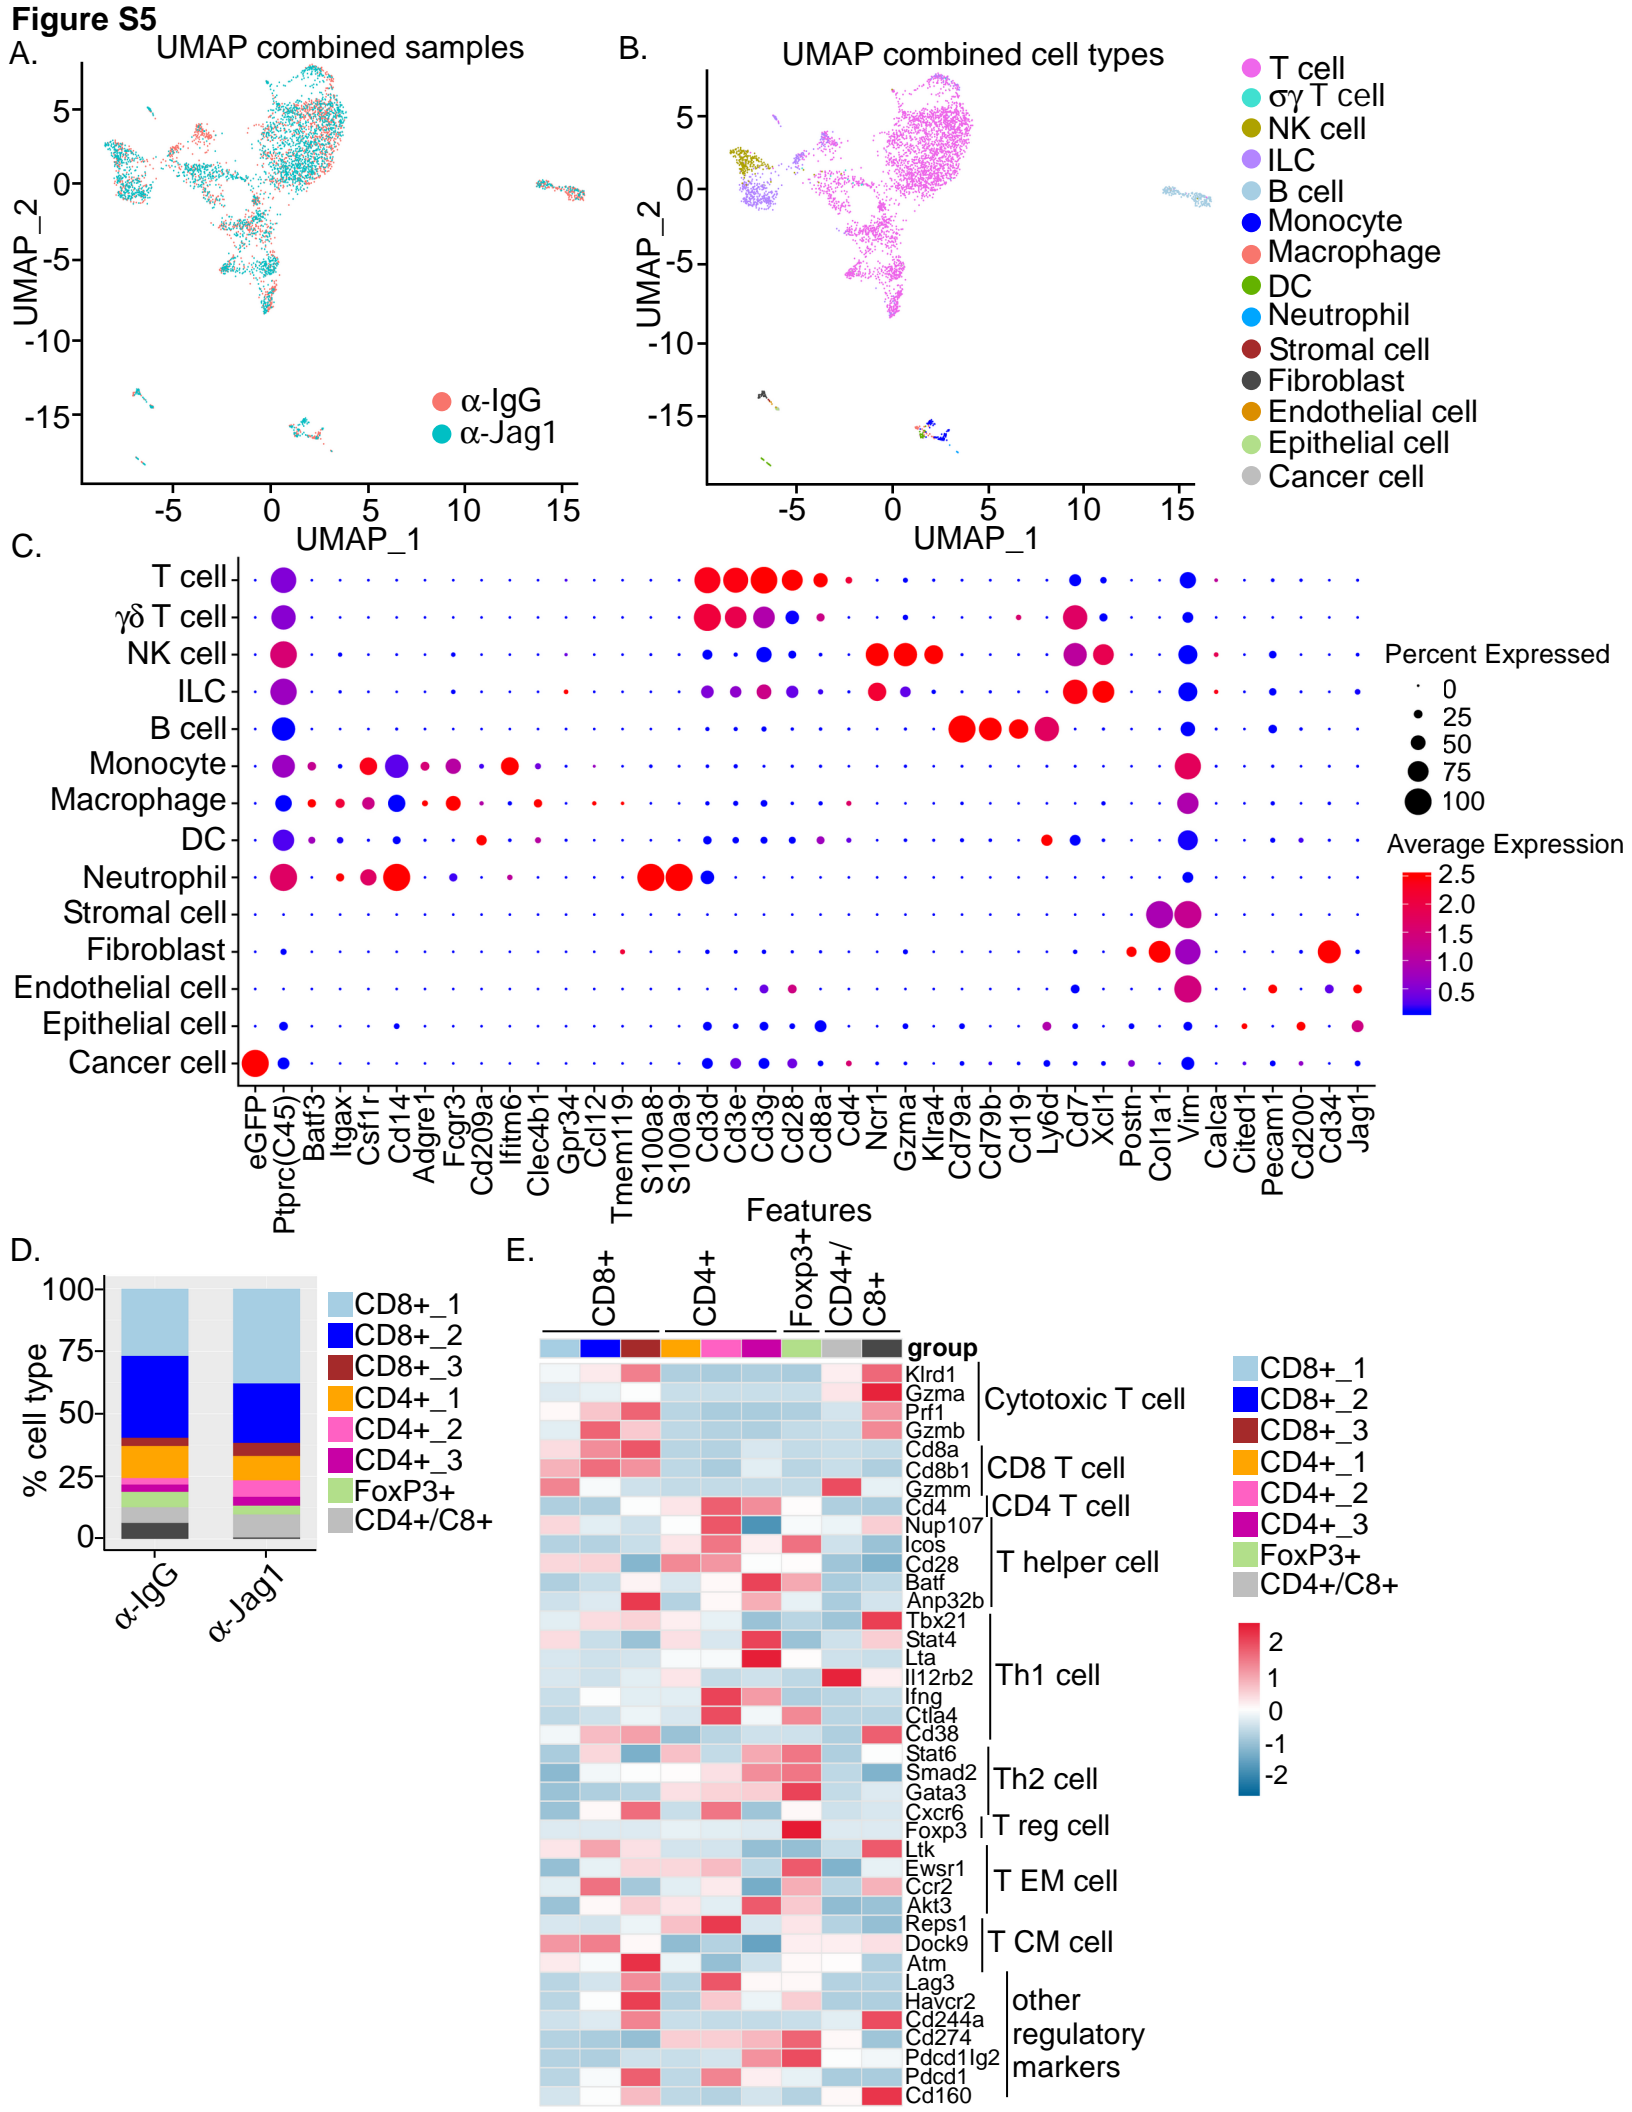

Supplement: NIHMS1768905-supplement-7.pdf [file NIHMS1768905-supplement-7.pdf]
